# Supplementary material for: Epigenetic adaptation of the placental serotonin transporter gene (SLC6A4) to gestational diabetes mellitus
Source: PLOS journal article supplement (doi:10.1371/journal.pone.0179934), 2017-06-26
Supplement: S9 (10.1371/journal.pone.0179934.s009) [file journal.pone.0179934.s009]

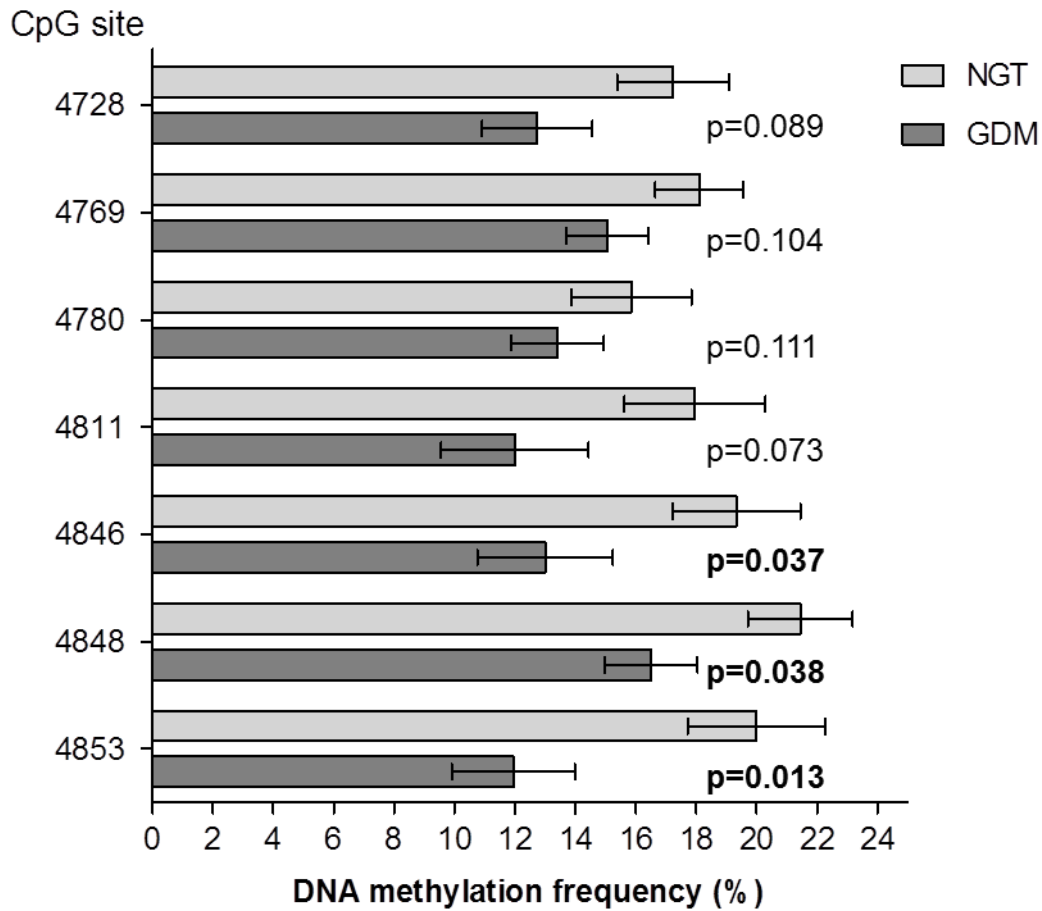

**S1 Figure.** Placental DNA methylation at individual *SLC6A4* loci in infants of mothers with normal glucose tolerance (NGT; n=32) and mothers with gestational diabetes mellitus (GDM, n=18). CpG sites are designated according to cytosine positions in NCBI reference sequence NG\_011747.2 (GeneBank). Shown are means and standard errors. Indicated p-values were calculated by Mann-Whitney U test.
